# Supplementary material for: Inversion of the melting point alternation in n-alkyl carboxylic acids by co-crystallization with pyrazine
Source: Royal Society of Chemistry journal article supplement (doi:10.1039/b517513e), 2006-01-01
Supplement: b517513e.pdf [file b517513e.pdf]

**S1. R.m.s. deviations (Å) of the 24 atoms in four adjacent pyrazine rings that make the repeating unit within each layer**

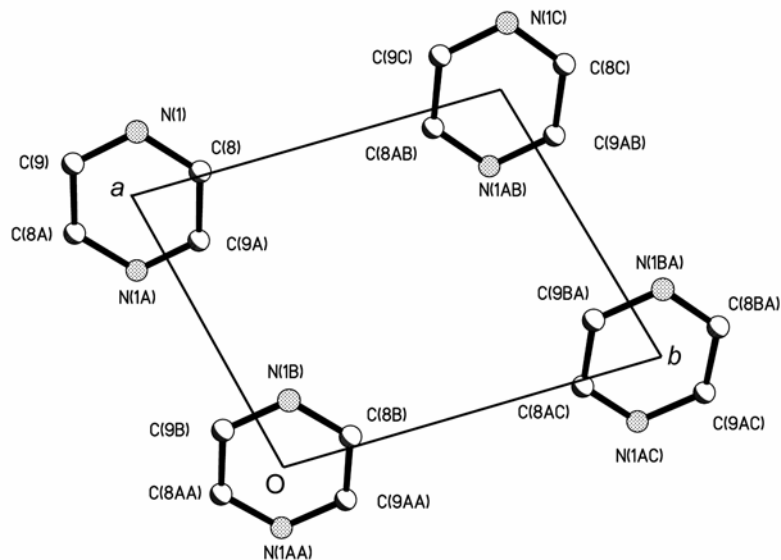

|                 | C <sub>7</sub> | C <sub>8</sub> | C <sub>9</sub> | C <sub>10</sub> | C <sub>11</sub> | C <sub>12</sub> | C <sub>13</sub> |
|-----------------|----------------|----------------|----------------|-----------------|-----------------|-----------------|-----------------|
| C <sub>7</sub>  | 0              |                |                |                 |                 |                 |                 |
| C <sub>8</sub>  | 0.033          | 0              |                |                 |                 |                 |                 |
| C <sub>9</sub>  | 0.036          | 0.020          | 0              |                 |                 |                 |                 |
| C <sub>10</sub> | 0.055          | 0.027          | 0.024          | 0               |                 |                 |                 |
| C <sub>11</sub> | 0.058          | 0.036          | 0.023          | 0.018           | 0               |                 |                 |
| C <sub>12</sub> | 0.063          | 0.034          | 0.032          | 0.010           | 0.023           | 0               |                 |
| C <sub>13</sub> | 0.066          | 0.047          | 0.034          | 0.032           | 0.020           | 0.033           | 0               |

## S2. Evaluation of the van der Waals contribution to the lattice energy for the co-crystals C<sub>7</sub>–C<sub>13</sub>

All calculations were performed within the *Cerius<sup>2</sup>* program [Accelrys]. The trimers were treated as rigid bodies. The van der Waals contribution between trimers was calculated using an atom-atom model, employing a standard 6-exp function within the Dreiding 2.21 force field [Mayo, Ollafson and Goddard, *J. Phys. Chem.* (1990), **94**, 8897], using all default parameters. The structures were energy minimized with the unit cell allowed to relax. Maximum cell deviations less than  $\pm 5\%$  confirm the validity of the description. Electrostatic terms were not modelled – however, the consistent arrangement within layers (see S1) requires that this contribution to the lattice energy is comparable in each structure.

|     |              | $E_{\text{vdw}}$<br>(kJ mol <sup>-1</sup> ) | $a$ (Å) | $b$ (Å) | $c$ (Å) | $\alpha$ (°) | $\beta$ (°) | $\gamma$ (°) |
|-----|--------------|---------------------------------------------|---------|---------|---------|--------------|-------------|--------------|
| C7  | Experimental | -167.2                                      | 5.511   | 6.897   | 13.786  | 76.82        | 85.7        | 76.8         |
|     | Minimized    | -176.6                                      | 5.563   | 6.694   | 14.305  | 77.16        | 88.43       | 78.2         |
|     | $\Delta$ (%) |                                             | 0.94    | -2.94   | 3.76    | 0.44         | 3.18        | 1.82         |
| C8  | Experimental | -182.4                                      | 5.477   | 6.909   | 15.21   | 81.54        | 84.98       | 76.16        |
|     | Minimized    | -190.9                                      | 5.492   | 6.72    | 15.669  | 83.53        | 83.16       | 76.96        |
|     | $\Delta$ (%) |                                             | 0.27    | -2.74   | 3.02    | 2.44         | -2.14       | 1.05         |
| C9  | Experimental | -200.3                                      | 5.473   | 6.878   | 16.382  | 89.78        | 82.99       | 76.09        |
|     | Minimized    | -208.7                                      | 5.48    | 6.664   | 17.073  | 90.72        | 81.39       | 77.32        |
|     | $\Delta$ (%) |                                             | 0.13    | -3.11   | 4.22    | 1.05         | -1.93       | 1.62         |
| C10 | Experimental | -216.0                                      | 5.457   | 6.897   | 18.039  | 80.58        | 81.94       | 75.55        |
|     | Minimized    | -224.0                                      | 5.44    | 6.704   | 18.61   | 79.64        | 83.48       | 76.67        |
|     | $\Delta$ (%) |                                             | -0.31   | -2.80   | 3.17    | -1.17        | 1.88        | 1.48         |
| C11 | Experimental | -237.7                                      | 5.457   | 6.866   | 18.98   | 84.79        | 90.87       | 75.59        |
|     | Minimized    | -243.9                                      | 5.459   | 6.665   | 19.488  | 85.95        | 89.81       | 76.83        |
|     | $\Delta$ (%) |                                             | 0.04    | -2.93   | 2.68    | 1.37         | -1.17       | 1.64         |
| C12 | Experimental | -250.9                                      | 5.445   | 6.903   | 20.307  | 89.8         | 88.44       | 75.43        |
|     | Minimized    | -258.8                                      | 5.413   | 6.718   | 20.831  | 91.56        | 87.6        | 76.73        |
|     | $\Delta$ (%) |                                             | -0.59   | -2.68   | 2.58    | 1.96         | -0.95       | 1.72         |
| C13 | Experimental | -274.1                                      | 5.441   | 6.844   | 21.498  | 84.69        | 92.96       | 75.57        |
|     | Minimized    | -280.6                                      | 5.446   | 6.655   | 22.108  | 83.81        | 93.8        | 76.89        |
|     | $\Delta$ (%) |                                             | 0.09    | -2.76   | 2.84    | -1.04        | 0.90        | 1.75         |

## S2. Evaluation of the van der Waals contribution to the lattice energy for the co-crystals C<sub>7</sub>–C<sub>13</sub>

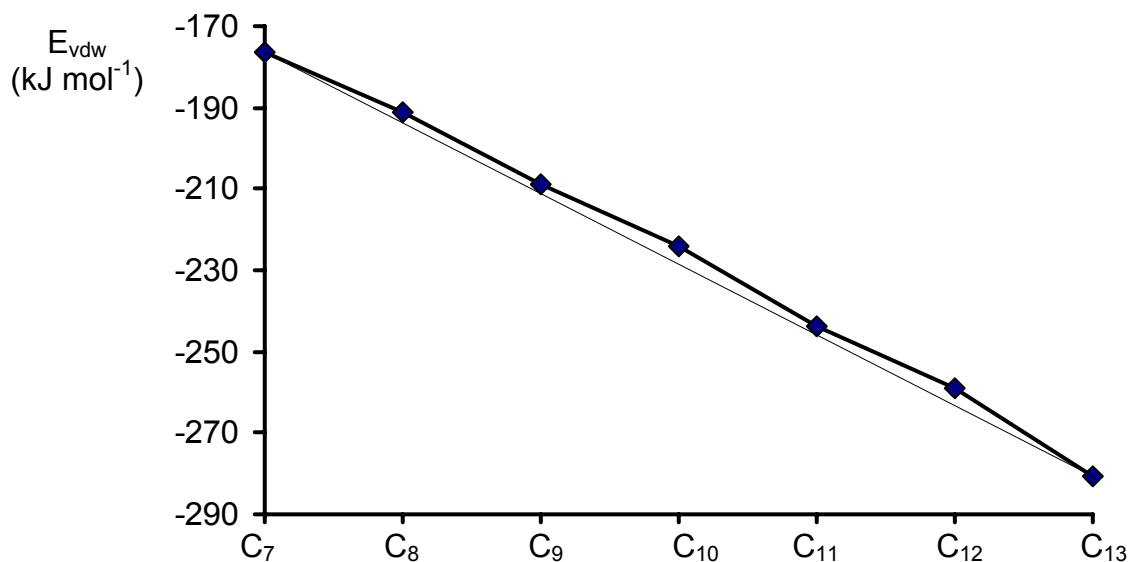

Plot of minimized  $E_{\text{vdw}}$  values, joined by lines to provide a guide to the eye. The thin line joins the two end points. The odd-membered co-crystals lie very close to this line, while the even-membered co-crystals lie clearly above it (i.e. they are systematically *less* stable).
